# Supplementary material for: Assessment of soil erosion vulnerability in the heavily populated and ecologically fragile communities in Motozintla de Mendoza, Chiapas, Mexico
Source: Copernicus journal article supplement (doi:10.5194/se-9-745-2018), 2018-06-13
Supplement: Supplementary file 1 [file se-9-745-2018-supplement.zip]

Archive with 3 entries (3 files):
- survey.docx
- se-9-745-2018-supplement-title-page.pdf
- Survey general questions and responses per community.xlsx
