# Supplementary material for: Assessment of soil erosion vulnerability in the heavily populated and ecologically fragile communities in Motozintla de Mendoza, Chiapas, Mexico
Source: Copernicus journal article supplement (doi:10.5194/se-9-745-2018), 2018-06-13
Supplement: Supplementary file 1 [file se-9-745-2018-supplement.zip › se-9-745-2018-supplement-title-page.pdf]

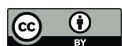

## *Supplement of*

# **Assessment of soil erosion vulnerability in the heavily populated and ecologically fragile communities in Motozintla de Mendoza, Chiapas, Mexico**

**Selene B. González-Morales et al.**

*Correspondence to:* Alex Mayer ([asmayer@mtu.edu](mailto:asmayer@mtu.edu))

- [se-9-745-2018-supplement-title-page.pdf](#)
- [Survey general questions and responses per community.xlsx](#)
- [survey.docx](#)

The copyright of individual parts of the supplement might differ from the CC BY 4.0 License.
